# Supplementary material
Source: HighWire-hosted journal article supplement (https://erj.ersjournals.com/highwire/filestream/113420/field_highwire_adjunct_files/0/Online_Supplement_ERJ-00251-2011R1.pdf)
Supplement: Online_Supplement_ERJ-00251-2011R1.pdf [file Online_Supplement_ERJ-00251-2011R1.pdf]

# AIRWAYS CHANGES RELATED TO AIR POLLUTION EXPOSURE IN WHEEZING CHILDREN

## ONLINE SUPPLEMENT

### MATERIAL AND METHODS

#### Population and protocol

The four included schools were selected from two different parts of Viseu: two main schools from the inner city (urban schools) and two main schools from the city area located outside the highway ring that surrounds Viseu (suburban schools).

The International Study of Asthma and Allergies in Childhood questionnaire (ISAAC) was fulfilled by parents.

Diagnoses of neuromuscular or psychiatric diseases and airways diseases other than asthma, constituted the exclusion criteria.

#### Skin prick tests

SPT were carried out with the following commercial extracts (Leti®): positive control (histamine 10 mg/ml), negative control (phenol-saline solution), *Dermatophagoides pteronyssinus*, *Dermatophagoides farinae*, dog dander, cat dander, cockroach, alternaria, grass mix, olive tree, pellitory plant, cypress, birch and oak trees. Extracts were introduced into the skin using Stallerpoint® lancets. A wheal with erythema with mean diameter over 3 mm was considered a positive result. Atopy was considered if there was at least a positive result to an allergen tested.

#### Airways assessment

Spirometry was performed using a portable pneumotachograph (Vitalograph® Compact, Vitalograph, Buckingham, U.K.) according to standardized guidelines<sup>1,2</sup>. Lung function was measured both before and 15 minutes after administration of bronchodilator. Lung function was expressed as the percentage of the predicted normal value according to Polgar reference equations<sup>3</sup>.  $\Delta FEV_1$  is presented as the percentage of improvement considering the baseline  $FEV_1$ .

EBC collection was performed according to the recommendations of the American Thoracic Society and European Respiratory Society (ATS/ERS)<sup>4</sup>, using a RTube® (Respiratory Research Inc., Austin Texas, U.S.A.). A nasal clip was used during the 15 minutes of the collection in order to achieve 1 to 3 mL of condensate. After collection, EBC was immediately frozen and stored until the pH measurement. pH analysis was performed two weeks after in the de-aerated samples (extraction of CO<sub>2</sub> with argon),

using a glass microelectrode (HI9025C, HANNA® Instruments Inc., Woonsocket, U.S.A.). F<sub>E</sub>NO measurement was performed before the spirometry, using a portable analyser, Niox® Mino (Aerocrine, Solna, Sweden), in which the expiratory flow rate is maintained at 50 mL/s. ATS/ERS recommendations were followed<sup>5</sup>.

### **Air quality measurements**

Concerning diffusive samplers, BTEX (benzene, toluene, ethylbenzene and xylenes) compounds were trapped by adsorption and recovered by carbon disulfide displacement and analysis was performed by flame ionization detector gas chromatography. For formaldehyde, the 2,4-dinitrophenylhydrazones were then extracted with acetonitrile and analyzed by reverse phase high-pressure liquid chromatography (HPLC) and UV detection. Both formaldehyde and BTEX measurements were done with Radiello® diffusive samplers (Tradate, Italy). NO<sub>2</sub> and O<sub>3</sub> diffusive samplers were produced in the University of Aveiro based on Palmes tubes<sup>6,7</sup> and analysed by spectrophotometry<sup>8</sup>. The detection limits for the diffusive samplers are: for BTEX and formaldehyde – 0.1 µg.m<sup>-3</sup>; for O<sub>3</sub> – 2 µg.m<sup>-3</sup>; for NO<sub>2</sub> – 1 µg.m<sup>-3</sup>.

Diffusive samplers were exposed during 5 days. PM<sub>10</sub> measurements were conducted during 2 weeks and the 5 x 24-hour measurements during the studied period were used.

### **Air quality modelling**

The CHIMERE multi-scale model is primarily designed to produce daily forecasts of ozone, aerosols and other pollutants and make long-term simulations for emission control scenarios. CHIMERE runs over a range of spatial scale from the regional scale (several thousand kilometers) to the urban scale (100-200 Km) with resolutions from 1-2 Km to 100 Km. This air quality modelling system based on the chemistry-transport model CHIMERE<sup>9</sup> forced by the mesoscale model MM5<sup>10</sup>, has been widely applied and validated and is currently used as the Portuguese air quality forecasting system<sup>11</sup>. The modelling system was applied first at the European scale (with 27 x 27 km resolution), then over Portugal using the same physics and a one-way nesting technique with 9 x 9 km, and 3 x 3 km, and finally over Viseu, at 1 x 1 km horizontal resolution. The assessment of the model performance was made by comparison of the modelling results with air quality measurements from a fixed air quality station. The statistical parameters used for the model evaluation are recommended by the Forum for air quality modelling for Europe (FAIRMODE)<sup>12</sup> and have been used in various air quality assessment studies<sup>11,13</sup>. The model results showed reasonable agreement with observations, with correlation coefficients around 0.7 and normalised errors between 10% and 30%.

### **Exposure assessment estimation**

Microenvironments where it was not possible to measure pollutants were geo-referenced and outdoor concentrations were obtained directly from modelling while for indoor concentrations indoor-outdoor relations from literature were used<sup>14,15</sup>. Details on methodology and results concerning air pollutants concentration measurements and modelling as well as exposure calculations were published elsewhere<sup>16</sup>. The exposure of

BTEX and formaldehyde were calculated entirely based on measured concentrations. O<sub>3</sub>, NO<sub>2</sub> and PM<sub>10</sub> exposure was estimated using both measurements and results from modelling. For O<sub>3</sub> and NO<sub>2</sub> the calculation included measured values of outdoor concentrations in schools and air quality modelling results since the measured concentrations were undetectable, namely in the indoors. Concerning PM<sub>10</sub>, measured concentrations were used for schools (indoor and outdoor), while for the other microenvironments (houses) concentrations were provided by air quality modelling.

## RESULTS

Children who did not accept to participate did not differ significantly in age ( $p=0.298$ ) and sex ( $p=0.868$ ) from the others. During the period of study, three children dropped out (two abandoned the study and one moved to another city) after the first visit.

Forty nine children had the four complete medical visits and two children had three. In the follow-up, we performed 202 spirometries, 202 F<sub>E</sub>NO evaluations and collected 204 breath samples. There were no missing data for PM<sub>10</sub>, O<sub>3</sub> and NO<sub>2</sub> neither for BTEX at schools. Overall we obtained 166 measurements of BTEX in the houses of the participating children, as some participants did not accept always the equipment at their houses while in others technical problems occurred.

The most common SPT positivities were to house dust mite (21 children) and grass pollen (18 children). Twenty percent of children had at least one smoking parent at home.

Differences between January and June were found with January showing the higher values of PM<sub>10</sub>, benzene, toluene, xylene and ethylbenzene. According to the Portuguese legislation concerning air quality, most of the pollutants concentrations were considered low and did not cause concern, with the exception of ambient air PM<sub>10</sub> that surpassed the limits. Relative humidity was higher and average temperature was lower in January, namely in the first year. Despite this, in the second year, the temperature was unexpected low in June.

Correlation matrixes for pollutants are presented for each season in Tables 1s, 2s, 3s and 4s. PM<sub>10</sub> was negatively correlated with individual exposure to NO<sub>2</sub> and ozone as consequence of the trend presented by NO<sub>2</sub> and ozone to be negatively correlated with the time spent indoors, where low levels of those pollutants were found.

In the univariable analysis we found associations between spirometric outcomes and most of the pollutants (Table 5s), with exception of xylene and formaldehyde. Some of those associations achieved a high statistical significance.

Univariable analysis for clinical outcomes is presented in Table 6s. Univariable analysis studying associations between spirometric outcomes and variables selected *a priori* and other variables included in the model, are presented in Tables 7s and 8s.

Two-pollutant models in order to take into account the correlations between pairs of pollutants were performed for FEV<sub>1</sub> (Figure 1s) and pH on EBC (Figure 2s). Generally the results presented the same trend of associations achieved in the one pollutant

models, although without reaching statistical significant associations. The exceptions were for benzene (FEV<sub>1</sub> as outcome) and PM<sub>10</sub> (pH as outcome), that persisted statistically significant also in the two-pollutant models. In the case of FEV<sub>1</sub>, the application of two-pollutant models for PM<sub>10</sub> and NO<sub>2</sub> was not conclusive because of fitting problems.

Reported wheezing symptoms, need of rescue medication and emergency department visits decreased along the study. At the end of the study, less than half of the participants mentioned symptoms in the previous months, namely “wheezing” that was the symptom that motivated the inclusion in the study.

## BIBLIOGRAPHY

1. Miller MR, Crapo R, Hankinson J, et al. General considerations for lung function testing. *Eur Respir J* 2005;**26**(1):153-61.
2. Miller MR, Hankinson J, Brusasco V, et al. Standardisation of spirometry. *Eur Respir J* 2005;**26**(2):319-38.
3. Ph HQ, Borsboom GJJM, Brunekreef B, et al. Spirometric reference values for white European children and adolescents: Polgar revisited. *Pediatric Pulmonology* 1995;**19**(2):135-142.
4. Horvath I, Hunt J, Barnes PJ, et al. Exhaled breath condensate: methodological recommendations and unresolved questions. *Eur Respir J* 2005;**26**(3):523-48.
5. ATS/ERS recommendations for standardized procedures for the online and offline measurement of exhaled lower respiratory nitric oxide and nasal nitric oxide, 2005. *Am J Respir Crit Care Med* 2005;**171**(8):912-30.
6. Palmes ED, Gunnison AF. Personal monitoring device for gaseous contaminants. *Am Ind Hyg Assoc J* 1973;**34**(2):78-81.
7. Palmes ED, Gunnison AF, DiMattio J, Tomczyk C. Personal sampler for nitrogen dioxide. *Am Ind Hyg Assoc J* 1976;**37**(10):570-7.
8. Nunes T, Fernandes A, Farinha A, Valente J, Lopes M, Santos J. Characterization of the indoor and outdoor air quality by diffusive samplers in the city of Viseu. *Proceedings of the 9th National Environment Conference, Aveiro, Portugal, 18-20 April 2007*. Ed. Universidade de Aveiro, 2007:898-904.
9. Bessagnet B, Hodzic A, Vautard R, et al. Aerosol modeling with CHIMERE--preliminary evaluation at the continental scale. *Atmospheric Environment* 2004;**38**(18):2803-2817.
10. Grell G, Dudhia J, Stauffer D. A description of the fifth-generation Penn State/NCAR mesoscale model (MM5). NCAR Technical Note, NCAR/TN-398+STR. *Mesoscale and Microscale Meteorology Division. National Center for Atmospheric Research, Boulder, Colorado* 1994.
11. Monteiro A, Vautard R, Borrego C, Miranda AI. Long-term simulations of photo oxidant pollution over Portugal using the CHIMERE model. *Atmospheric Environment* 2005;**39**(17):3089-3101.
12. Denby B, Georgieva E, Larssen S, et al. Guidance on the use of models for the European Air Quality Directive: A working document of the Forum for Air Quality Modelling in Europe FAIRMODE. Version 5.1, 2010.
13. Borrego C, Valente J, Carvalho A, Sá E, Lopes M, Miranda AI. Contribution of residential wood combustion to PM10 levels in Portugal. *Atmospheric Environment* 2010;**44**(5):642-651.
14. Gulliver J, Briggs DJ. Personal exposure to particulate air pollution in transport microenvironments. *Atmospheric Environment* 2004;**38**(1):1-8.
15. Environmental Protection Agency. Air quality criteria for particulate matter, Volume 1. Washington, DC, US. 1996:1084.
16. Borrego C, Lopes M, Valente J, et al. Air Pollution and child respiratory diseases: the Viseu case-study, Portugal. *Air Pollution XV, Eds. CA Borrego, CA Brebbia, WIT Press, Southampton, UK* 2007:15 – 24.



**Table 1s:** Spearman rank order correlation coefficients of individual exposure to pollutants, for Visit 1

|                        | <b>PM<sub>10</sub></b> | <b>O<sub>3</sub></b> | <b>NO<sub>2</sub></b> | <b>Benzene</b> | <b>Toluene</b> | <b>Xylene</b> | <b>Ethylbenzene</b> | <b>Formaldehyde</b> |
|------------------------|------------------------|----------------------|-----------------------|----------------|----------------|---------------|---------------------|---------------------|
| <b>PM<sub>10</sub></b> |                        | -0.277(*)            | -0.642(**)            | 0.356(*)       | 0.082          | 0.020         | 0.046               | -0.038              |
| <b>O<sub>3</sub></b>   |                        |                      | 0.822(**)             | -0.294(*)      | -0.164         | 0.013         | -0.061              | -0.511(**)          |
| <b>NO<sub>2</sub></b>  |                        |                      |                       | -0.423(**)     | -0.151         | 0.003         | -0.075              | -0.357(*)           |
| <b>Benzene</b>         |                        |                      |                       |                | 0.190          | 0.394(*)      | 0.424(**)           | 0.284               |
| <b>Toluene</b>         |                        |                      |                       |                |                | 0.576(**)     | 0.660(**)           | 0.071               |
| <b>Xylene</b>          |                        |                      |                       |                |                |               | 0.961(**)           | 0.050               |
| <b>Ethylbenzene</b>    |                        |                      |                       |                |                |               |                     | 0.133               |

\*\* Correlation is significant at the 0.01 level (2-tailed); \* Correlation is significant at the 0.05 level (2-tailed)

**Table 2s:** Spearman rank order correlation coefficients of individual exposure to pollutants, for Visit 2

|                        | <b>PM<sub>10</sub></b> | <b>O<sub>3</sub></b> | <b>NO<sub>2</sub></b> | <b>Benzene</b> | <b>Toluene</b> | <b>Xylene</b> | <b>Ethylbenzene</b> | <b>Formaldehyde</b> |
|------------------------|------------------------|----------------------|-----------------------|----------------|----------------|---------------|---------------------|---------------------|
| <b>PM<sub>10</sub></b> |                        | -0.251               | -0.719(**)            | -0.065         | -0.103         | -0.115        | -0.111              | -0.035              |
| <b>O<sub>3</sub></b>   |                        |                      | 0.223                 | -0.069         | 0.502(**)      | 0.429(**)     | 0.406(*)            | -0.250              |
| <b>NO<sub>2</sub></b>  |                        |                      |                       | -0.038         | -0.075         | 0.007         | -0.020              | 0.025               |
| <b>Benzene</b>         |                        |                      |                       |                | 0.319          | 0.345(*)      | 0.345(*)            | 0.416(**)           |
| <b>Toluene</b>         |                        |                      |                       |                |                | 0.652(**)     | 0.607(**)           | 0.123               |
| <b>Xylene</b>          |                        |                      |                       |                |                |               | 0.936(**)           | 0.419(**)           |
| <b>Ethylbenzene</b>    |                        |                      |                       |                |                |               |                     | 0.326(*)            |

\*\* Correlation is significant at the 0.01 level (2-tailed); \* Correlation is significant at the 0.05 level (2-tailed)

**Table 3s:** Spearman rank order correlation coefficients of individual exposure to pollutants, for Visit 3

|                        | <b>PM<sub>10</sub></b> | <b>O<sub>3</sub></b> | <b>NO<sub>2</sub></b> | <b>Benzene</b> | <b>Toluene</b> | <b>Xylene</b> | <b>Ethylbenzene</b> | <b>Formaldehyde</b> |
|------------------------|------------------------|----------------------|-----------------------|----------------|----------------|---------------|---------------------|---------------------|
| <b>PM<sub>10</sub></b> |                        | 0.063                | -0.547(**)            | -0.105         | -0.194         | -0.134        | -0.147              | -0.113              |
| <b>O<sub>3</sub></b>   |                        |                      | -0.517(**)            | -0.043         | 0.502(**)      | 0.429(**)     | 0.406(*)            | -0.250              |
| <b>NO<sub>2</sub></b>  |                        |                      |                       | -0.102         | -0.194         | -0.100        | -0.227              | -0.261              |
| <b>Benzene</b>         |                        |                      |                       |                | 0.527(**)      | 0.149         | 0.586(**)           | -0.028              |
| <b>Toluene</b>         |                        |                      |                       |                |                | 0.451(**)     | 0.632(**)           | 0.214               |
| <b>Xylene</b>          |                        |                      |                       |                |                |               | 0.500(**)           | 0.250               |
| <b>Ethylbenzene</b>    |                        |                      |                       |                |                |               |                     | 0.163               |

\*\* Correlation is significant at the 0.01 level (2-tailed); \* Correlation is significant at the 0.05 level (2-tailed)

**Table 4s:** Spearman rank order correlation coefficients of individual exposure to pollutants, for Visit 4

|                        | <b>PM<sub>10</sub></b> | <b>O<sub>3</sub></b> | <b>NO<sub>2</sub></b> | <b>Benzene</b> | <b>Toluene</b> | <b>Xylene</b> | <b>Ethylbenzene</b> | <b>Formaldehyde</b> |
|------------------------|------------------------|----------------------|-----------------------|----------------|----------------|---------------|---------------------|---------------------|
| <b>PM<sub>10</sub></b> |                        | -0.528(**)           | -0.816(**)            | -0.003         | 0.131          | 0.262         | 0.253               | 0.033               |
| <b>O<sub>3</sub></b>   |                        |                      | 0.528(**)             | 0.019          | -0.181         | -0.297(*)     | -0.264              | -0.235              |
| <b>NO<sub>2</sub></b>  |                        |                      |                       | 0.138          | -0.176         | -0.221        | -0.029              | -0.226              |
| <b>Benzene</b>         |                        |                      |                       |                | 0.326(*)       | 0.503(**)     | 0.448(**)           | -0.055              |
| <b>Toluene</b>         |                        |                      |                       |                |                | 0.483(**)     | 0.462(**)           | 0.262               |
| <b>Xylene</b>          |                        |                      |                       |                |                |               | 0.977(**)           | 0.065               |
| <b>Ethylbenzene</b>    |                        |                      |                       |                |                |               |                     | 0.045               |

\*\* Correlation is significant at the 0.01 level (2-tailed); \* Correlation is significant at the 0.05 level (2-tailed)



**Table 5s: Relationships between different pollutants exposure and spirometry / airways inflammation outcomes (Crude regression coefficients, CI 95%, p value)**

|                        | FEV <sub>1</sub> %                  | FEV <sub>1</sub> /FVC              | FEF25-75%                          | ΔFEV <sub>1</sub> %             | pH EBC                             | F <sub>E</sub> NO ppb             |
|------------------------|-------------------------------------|------------------------------------|------------------------------------|---------------------------------|------------------------------------|-----------------------------------|
| <b>PM<sub>10</sub></b> | -0.43 (-1.32 to 0.47),<br>NS        | -0.62 (-1.07 to -0.17),<br>p=0.008 | -0.75 (-2.11 to 0.62),<br>NS       | 0.63 (0.03 to 1.23),<br>p=0.039 | 0.00 (-0.06 to 0.07),<br>NS        | -0.99 (-2.14 to 0.15),<br>p=0.089 |
| <b>O<sub>3</sub></b>   | -1.68 (-2.95- to -0.44),<br>p=0.008 | 0.72 (0.07 to 1.38),<br>p=0.031    | -1.21(-3.16 to 0.69),<br>NS        | -0.09 (-0.97 to 0.77),<br>NS    | -0.22 (-0.29 to -0.13),<br>p<0.001 | 3.37 (1.80 to 4.93),<br>p<0.001   |
| <b>NO<sub>2</sub></b>  | -4.36 (-6.70 to -2.01),<br>p<0.001  | 0.12 (-1.15 to 1.39),<br>NS        | -4.66 (-8.34 to -0.98),<br>p=0.013 | 1.05 (-0.61 to 2.72),<br>NS     | -0.44 (-0.60 to -0.28),<br>p<0.001 | 5.11 (2.04 to 8.18),<br>p=0.001   |
| <b>Benzene</b>         | -4.78 (-7.18 to -2.37),<br>p<0.001  | -1.72 (-3.12 to -0.32),<br>p=0.016 | -6.02 (-9.79 to -2.25),<br>p=0.002 | 3.06 (1.42 to 4.70),<br>p<0.001 | -0.23 (-0.40 to 0.05),<br>p=0.011  | 3.10 (-3.93 to 6.60),<br>p=0.082  |
| <b>Toluene</b>         | -0.83 (-1.63 to -0.03),<br>p=0.041  | -0.42 (-0.87 to 0.02),<br>p=0.063  | -0.99 (-2.23 to 0.25),<br>NS       | 0.96 (0.46 to 1.45),<br>p<0.001 | 0.01 (-0.04 to 0.07),<br>NS        | 0.36 (-0.74 to 1.48),<br>NS       |
| <b>Xylene</b>          | -0.26 (-1.07 to 0.53),<br>NS        | 0.09 (-0.36 to 0.55),<br>NS        | -0.21 (-1.45 to 1.03),<br>NS       | -0.25 (-0.79 to 0.29),<br>NS    | -0.00 (-0.06 to 0.05),<br>NS       | 0.82 (-0.29 to 1.93),<br>NS       |
| <b>Ethylbenzene</b>    | -1.98 (-3.29 to -0.67),<br>p=0.003  | -0.33 (-1.10 to 0.45),<br>NS       | -2.41 (-4.47 to -0.35),<br>p=0.022 | 1.23 (0.32 to 2.16),<br>p=0.008 | -0.16 (-0.25 to -0.06),<br>p=0.001 | 2.55 (0.68 to 4.42),<br>p=0.007   |
| <b>Formaldehyde</b>    | -0.22 (-3.61 to 3.18),<br>NS        | -0.33 (-2.08 to 1.41),<br>NS       | -0.82 (-5.95 to 4.31),<br>NS       | -0.02 (-1.96 to 1.92),<br>NS    | 0.02(-0.19 to 0.23),<br>NS         | 0.23 (-4.02 to 4.49),<br>NS       |

FVC: Forced Vital Capacity; :FEV<sub>1</sub>: Forced Expiratory Volume in 1 second; FEF25-75%: Forced Expiratory Flow between 25-75% of vital capacity; ΔFEV<sub>1</sub>: The increase of FEV<sub>1</sub> as a percentage of the initial value, after bronchodilator; EBC: Exhaled Breath Condensate; F<sub>E</sub>NO: Fraction of exhaled nitric oxide; CI: Confidence interval; NS: p-value > 0.100  
Regression coefficients (CI 95%) represent the mean change in spirometric and inflammatory parameters for increments of 10 μg.m<sup>3</sup> of air pollutant

**Table 6s: Relationships between different exposures to pollutants and clinical outcomes (Crude regression coefficients, CI 95%, p value)**

|                        | <b>Wheezing</b>                    | <b>Need of rescue medication</b> | <b>Emergency Department</b>        |
|------------------------|------------------------------------|----------------------------------|------------------------------------|
| <b>PM<sub>10</sub></b> | 0.07(0.03 to 0.11),<br>p=0.002     | 0.03(-0.00 to 0.07),<br>p=0.127  | 0.04(-0.00 to 0.08),<br>p=0.059    |
| <b>O<sub>3</sub></b>   | -0.20 (-0.25 to -0.14),<br>p=0.000 | -0.06(-0.12 to 0.01),<br>p=0.021 | -0.10(-0.15 to -0.44),<br>p=0.000  |
| <b>NO<sub>2</sub></b>  | -0.27 (-0.39 to -0.16),<br>p=0.000 | -0.07(-0.18 to 0.03),<br>p=0.175 | -0.13 (-0.24 to -0.03),<br>p=0.012 |
| <b>Benzene</b>         | -0.03 (-0.08 to 0.02),<br>p=0.269  | 0.01 (-0.03 to 0.06),<br>p=0.555 | 0.03(-0.01 to 0.07),<br>p=0.162    |
| <b>Toluene</b>         | 0.04(0.00 to 0.07),<br>p=0.023     | 0.01 (0.02 to 0.04),<br>p=0.474  | 0.01(-0.01 to 0.04),<br>p=0.304    |
| <b>Xylene</b>          | -0.04 (-0.12 to 0.05),<br>p=0.382  | -0.00(-0.08 to 0.07),<br>p=0.921 | 0.00(-0.067 to 0.08),<br>p=0.866   |
| <b>Mp-Xylene</b>       | 0.10 (-0.04 to 0.17),<br>p=0.002   | 0.1 (0.04 to 0.16),<br>p=0.001   | 0.09(0.03 to 0.14),<br>p=0.002     |
| <b>Ethylbenzene</b>    | -0.01(0.05 to 0.03),<br>p=0.534    | -0.00(-0.04 to 0.02),<br>p=0.589 | 0.02(-0.01 to 0.05),<br>p=0.240    |
| <b>Formaldehyde</b>    | 0.10(0.01 to 0.18),<br>p=0.025     | 0.02 (-0.06 to 0.10),<br>p=0.642 | 0.03(-0.36 to 0.10),<br>p=0.338    |

CI: Confidence interval

Regression coefficients (CI 95%) represent the mean change in clinical outcomes for increments of 10 µg.m<sup>3</sup> of air pollutant

**Table 7s: Relationships between different variables included *a priori* and spirometry / airways inflammation outcomes (Crude regression coefficients, CI 95%, p value)**

|                            | FEV <sub>1</sub> %                   | FEV <sub>1</sub> /FVC             | FEF25-75%                          | ΔFEV <sub>1</sub> %                 | pH EBC                             | F <sub>E</sub> NO ppb              |
|----------------------------|--------------------------------------|-----------------------------------|------------------------------------|-------------------------------------|------------------------------------|------------------------------------|
| <b>Age (years)</b>         | -3.04 (-4.74 to -1.34),<br>p<0.001   | 0.62 (-0.24 to 1.49),<br>p=0.159  | -2.36 (-5.00 to 0.29),<br>p=0.081  | -0.90 (-0.02 to 1.83),<br>p=0.056   | -0.15 (-0.25 to -0.60),<br>p=0.001 | 4.41 (2.37 to 6.45),<br>p<0.001    |
| <b>Sex</b>                 |                                      |                                   |                                    |                                     |                                    |                                    |
| Women                      | -10.12 (-17.29 to -2.95),<br>p=0.006 | 1.16 (-2.43 to 4.75),<br>p=0.526  | -5.39 (-17.95 to 7.15),<br>p=0.399 | 1.63 (-1.25 to 4.50),<br>p=0.269    | 0.03 (-0.25 to 0.31),<br>p=0.830   | -7.34 (-15.14 to 0.47),<br>p=0.065 |
| <b>Parental education</b>  |                                      |                                   |                                    |                                     |                                    |                                    |
| High School or University  | 5.87 (-1.65 to 13.39),<br>p=0.127    | 1.85 (-1.72 to 5.41),<br>p=0.311  | 10.19 (-2.12 to 22.50),<br>p=0.102 | -2.80 (-5.59 to - 0.00),<br>p=0.050 | -0.08 (-0.35 to 0.20),<br>p=0.585  | -0.03 (-8.09 to 8.02),<br>p=0.994  |
| <b>Passive smoking</b>     |                                      |                                   |                                    |                                     |                                    |                                    |
| Yes                        | -3.90 (-13.49 to 5.68),<br>p=0.425   | -0.91 (-5.42 to 3.60),<br>p=0.691 | -6.41 (-22.15 to 9.32),<br>p=0.424 | 0.72 (-2.90 to 4.34),<br>p=0.697    | -0.11 (-0.46 to 0.23),<br>p=0.585  | 0.10 (-9.99 to 10.20),<br>p=0.984  |
| <b>Atopy</b>               |                                      |                                   |                                    |                                     |                                    |                                    |
| Yes                        | -3.34 (-8.01 to 7.34),<br>p=0.932    | -1.18 (-4.76 to 2.40),<br>p=0.518 | -0.32(-12.92 to 12.27),<br>p=0.960 | 0.81 (-2.80 to 3.70),<br>p=0.583    | -0.24 (-0.51 to 0.02),<br>p=0.073  | 20.69 (15.10 to 26.28),<br>p<0.001 |
| <b>Average temperature</b> |                                      |                                   |                                    |                                     |                                    |                                    |
| One C° increase            | 0.14 (-0.08 to 0.37),<br>p=0.208     | 0.08(-0.03 to 0.20),<br>p=0.161   | 0.21 (-0.13 to 0.56),<br>p=0.224   | -0.08 (-0.23 to 0.07),<br>p= 0.297  | -0.00(-0.02 to 0.01),<br>p=0.668   | 0.10 (-0.19 to 0.40),<br>p=0.476   |
| <b>Average humidity</b>    |                                      |                                   |                                    |                                     |                                    |                                    |
| % increase                 | -0.00 (-0.15 to 0.15),<br>p=0.971    | -0.06 (-0.14 to 0.01),<br>p=0.117 | -0.08 (-0.31to 0.15),<br>p=0.504   | 0.04 (-0.06 to 0.14),<br>p= 0.415   | 0.01 (-0.00 to 0.02),<br>p=0.100   | -0.21(-0.40 to -0.03),<br>p=0.025  |
| <b>Time</b>                | -1.41 (-2.48 to -0.35),<br>p=0.009   | 0.063 (0.07 to 1.19),<br>p=0.029  | -0.98 (-2.61 to 0.68),<br>p=0.246  | -0.12 (-0.86 to -0.62),<br>p=0.746  | -0.19 (-0.26 to -0.12),<br>p<0.001 | 2.94 (1.60 to 4.27),<br>p<0.001    |

FVC: Forced Vital Capacity; :FEV<sub>1</sub>: Forced Expiratory Volume in 1 second; FEF25-75%: Forced Expiratory Flow between 25-75% of vital capacity; ΔFEV<sub>1</sub>: The increase of FEV<sub>1</sub> as a percentage of the initial value, after bronchodilator; EBC: Exhaled Breath Condensate; F<sub>E</sub>NO: Fraction of exhaled nitric oxide; CI: Confidence interval

**Table 8s: Relationships between other variables and spirometry / airways inflammation outcomes (Crude regression coefficients, CI 95%, p value)**

|                                 | FEV <sub>1</sub> %                   | FEV <sub>1</sub> /FVC               | FEF25-75%                            | ΔFEV <sub>1</sub> %                | pH EBC                               | F <sub>E</sub> NO ppb              |
|---------------------------------|--------------------------------------|-------------------------------------|--------------------------------------|------------------------------------|--------------------------------------|------------------------------------|
| <b>Height</b>                   |                                      |                                     |                                      |                                    |                                      |                                    |
| (1 cm increase)                 | -0.52 (-0.83 to -0.21),<br>p=0.001   | 0.11 (-0.04 to 0.26),<br>p=0.177    | -0.40 (-0.88 to 0.09),<br>p=0.108    | 0.01 (-0.14 to 0.17),<br>p=0.872   | -0.02 (-0.04 to - 0.00),<br>p= 0.010 | 0.74 (0.39 to 1.09),<br>p<0.001    |
| <b>Weight</b>                   |                                      |                                     |                                      |                                    |                                      |                                    |
| (1 Kg increase)                 | -0.39 (-0.76 to -0.02),<br>p=0.040   | -0.08 (-0.10 to 0.26),<br>p=0.399   | -0.22 (-0.80 to 0.36),<br>p=0.447    | 0.04 (-0.14 to 0.22),<br>p= 0.640  | -0.02(-0.04 to 0.00),<br>p=0.048     | 0.76 (0.34 to 1.17),<br>p<0.001    |
| <b>Pets at home</b>             |                                      |                                     |                                      |                                    |                                      |                                    |
| Yes                             | -1.94 (-9.62 to 5.73),<br>p=0.620    | 1.46 (-2.04 to 4.96),<br>p=0.415    | 3.18 (-9.22 to 15.59),<br>p=0.615    | -1.31(-4.22 to 1.60),<br>p=0.378   | 0.22 (-0.05 to 0.49),<br>p=0.118     | -7.27 (-15.06 to 0.52),<br>p=0.067 |
| <b>Older siblings</b>           |                                      |                                     |                                      |                                    |                                      |                                    |
| Yes                             | 4.82 (-2.63 to 12.30),<br>p=0.206    | 2.38 (-1.05 to 5.80),<br>p=0.174    | 10.85 (-1.09 to 22.80),<br>p=0.075   | -1.04 (-3.92 to 1.84),<br>p=0.481  | -0.10 (-0.37 to 0.17),<br>p=0.482    | -7.33 (-15.03 to 0.36),<br>p=0.062 |
| <b>Mold or dampness at home</b> |                                      |                                     |                                      |                                    |                                      |                                    |
| Yes                             | -14.20 (-25.20 to -3.21),<br>p=0.011 | -5.99 (-11.08 to -0.88),<br>p=0.021 | -24.93 (-42.55 to -7.31),<br>p=0.006 | 8.16 (4.33 to 11.98),<br>p<0.001   | -0.04 (-0.45 to 0.38),<br>p=0.871    | -2.60 (-14.79 to 9.58),<br>p=0.675 |
| <b>Fireplace at home</b>        |                                      |                                     |                                      |                                    |                                      |                                    |
| Yes                             | 2.66 (-4.97 to 10.08),<br>p=0.506    | 2.95 (-0.429 to 6.33),<br>p=0.087   | 11.21 (-0.66 to 23.08),<br>p=0.064   | -3.07 (-5.84 to -0.31),<br>p=0.029 | -0.13 (-0.40 to 0.14),<br>p=0.338    | -2.66 (-10.54 to 5.21),<br>p=0.500 |

FVC: Forced Vital Capacity; FEV<sub>1</sub>: Forced Expiratory Volume in 1 second; FEF25-75%: Forced Expiratory Flow between 25-75% of vital capacity; ΔFEV<sub>1</sub>: The increase of FEV<sub>1</sub> as a percentage of the initial value, after bronchodilator; EBC: Exhaled Breath Condensate; F<sub>E</sub>NO: Fraction of exhaled nitric oxide; CI: Confidence interval

# FEV<sub>1</sub>

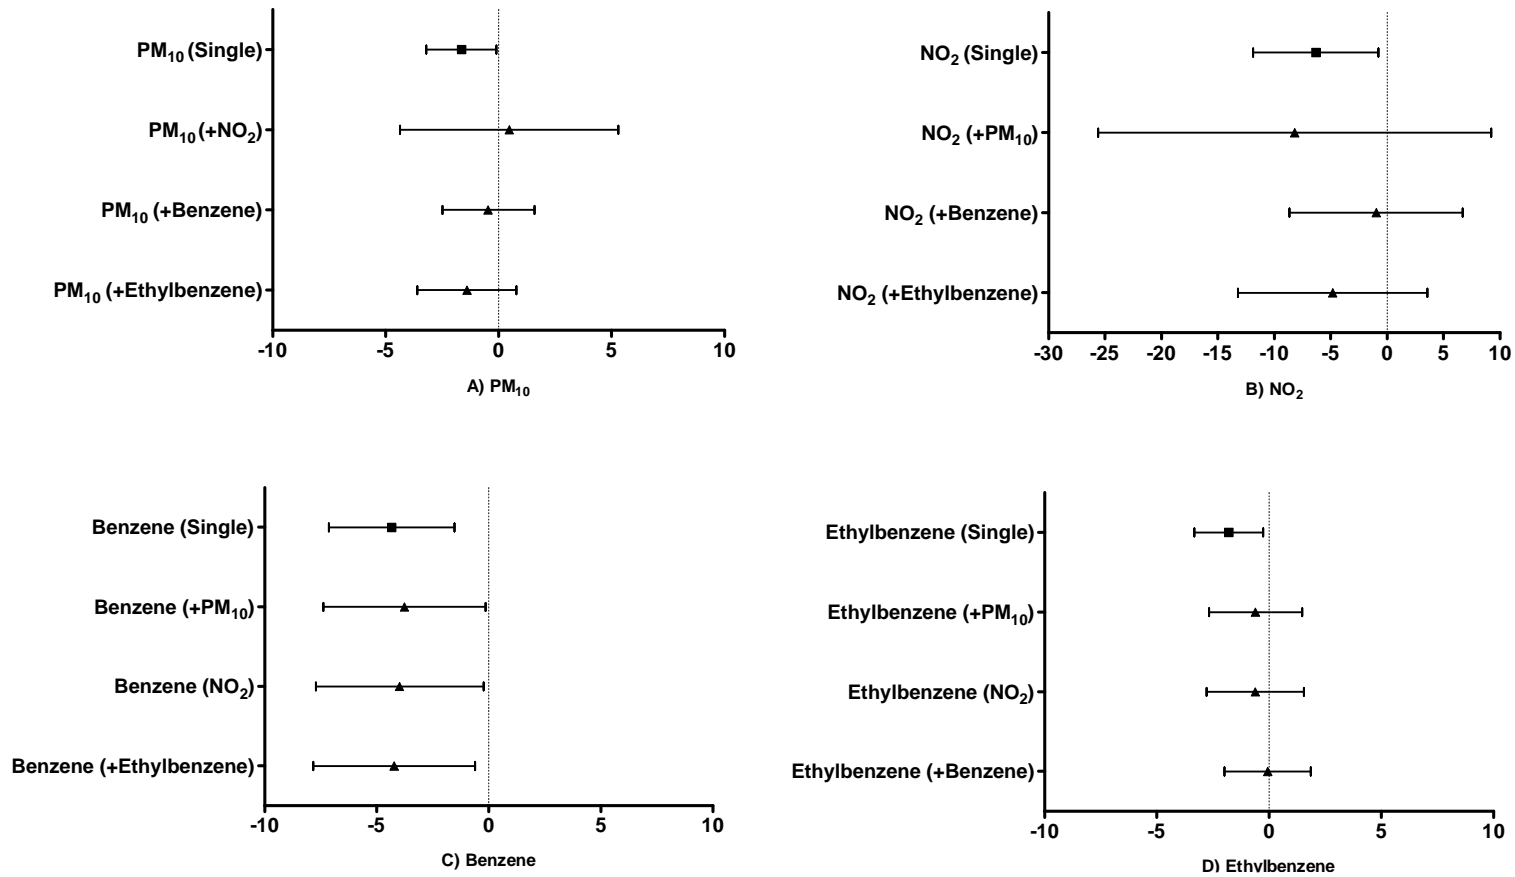

Figure 1s: Percent changes and corresponding 95% confidence intervals in FEV<sub>1</sub> for 10 µg.m<sup>-3</sup>.h increments of air pollutant, after adjustment, in one (single) and two pollutants model. Results are presented for each pollutant - A) PM<sub>10</sub> B) NO<sub>2</sub> C) benzene and D) ethylbenzene - adjusted for the second pollutant (+).

## pH

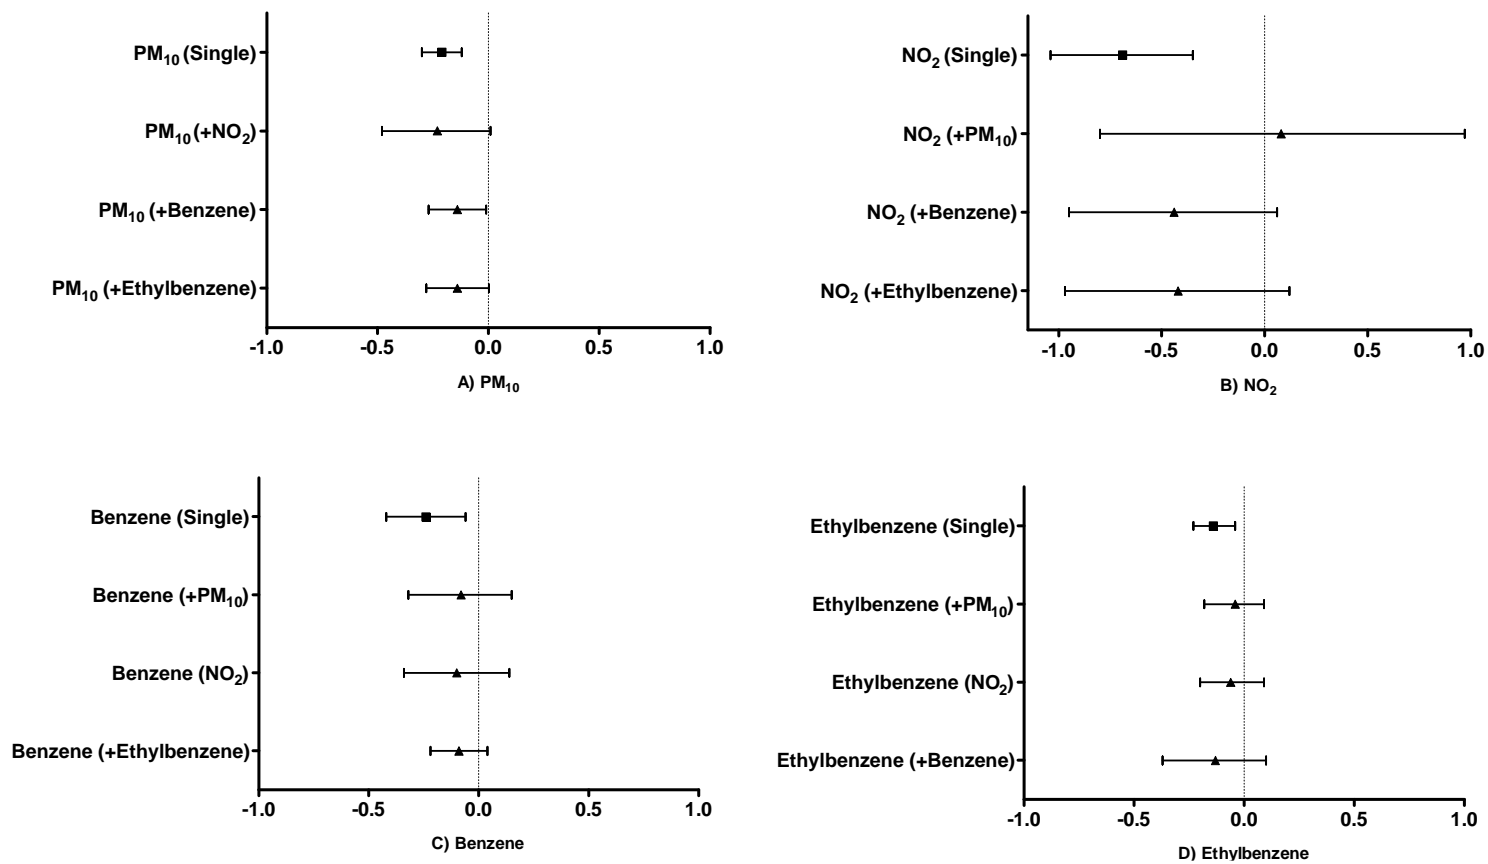

Figure 2s: Exhaled breath condensate pH changes and corresponding 95% confidence intervals for 10  $\mu\text{g}\cdot\text{m}^{-3}\cdot\text{h}$  increments of air pollutant, after adjustment, in one (single) and two pollutants model. Results are presented for each pollutant - A) PM<sub>10</sub> B) NO<sub>2</sub> C) benzene and D) ethylbenzene - adjusted for the second pollutant (+).
